# Supplementary material for: Expanding magnetic organelle biogenesis in the domain Bacteria
Source: PubMed Central journal article supplement (PMC7602337; doi:10.1186/s40168-020-00931-9), 2020-10-30
Supplement: 40168_2020_931_MOESM4_ESM.pdf [file 40168_2020_931_MOESM4_ESM.pdf]

MTB genomes reconstructed in this study  
Previously published MTB genomes

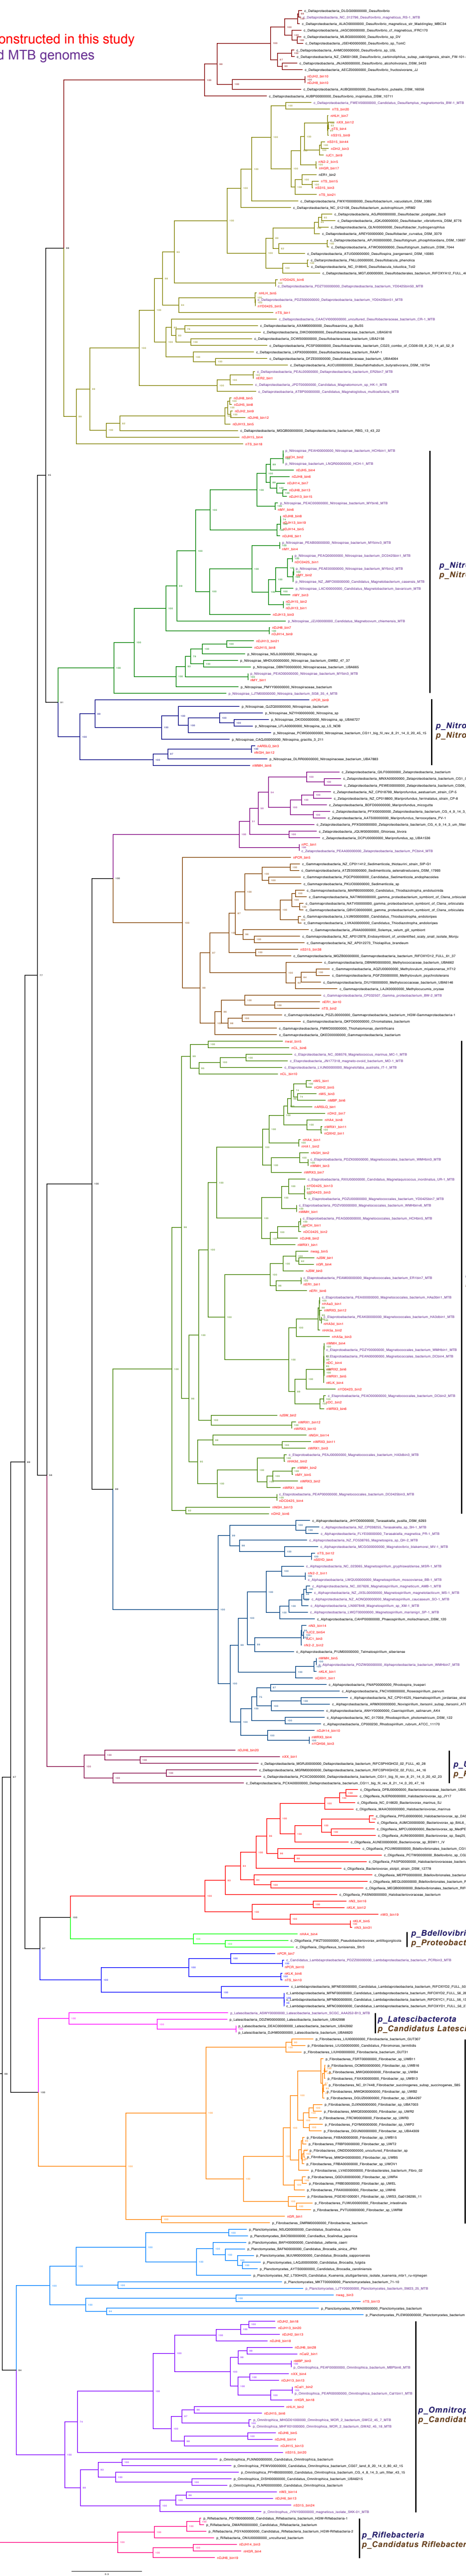

p\_Desulfobacterota\_A  
p\_Proteobacteria;c\_Deltaproteobacteria

p\_Desulfobacterota  
p\_Proteobacteria;c\_Deltaproteobacteria

p\_Nitrospirota  
p\_Nitrospirae

p\_Nitrospinota  
p\_Nitrospiniae

p\_Proteobacteria;c\_Zetaproteobacteria  
p\_Proteobacteria;c\_Zetaproteobacteria

p\_Proteobacteria;c\_Gammaproteobacteria  
p\_Proteobacteria;c\_Gammaproteobacteria

p\_Proteobacteria;c\_Magnetococcia  
p\_Proteobacteria;c\_Etaproteobacteria

p\_Proteobacteria;c\_Alphaproteobacteria  
p\_Proteobacteria;c\_Alphaproteobacteria

p\_UBA10199  
p\_Proteobacteria;c\_Deltaproteobacteria\_2

p\_Bdellovibrionota  
p\_Proteobacteria;c\_Oligoflexia

p\_Bdellovibrionota\_B  
p\_Proteobacteria;c\_Oligoflexia

p\_SAR324  
p\_Proteobacteria;c\_Lambdaproteobacteria

p\_Latescibacterota  
p\_Candidatus Latescibacter

p\_Fibrobacterota  
p\_Fibrobacteres

p\_Planctomycetota  
p\_Planctomycetes

p\_Omnitrophota  
p\_Omnitrophota Omnitrophica

p\_Riflibacterota  
p\_Candidatus Riflibacter
